---

Erratum

## Erratum to: GADGETS: a genetic algorithm for detecting epistasis using nuclear families

Michael Nodzenski , Min Shi , Juno M. Krahn, Alison S. Wise, Yuanyuan Li, Leping Li , David M. Umbach  and Clarice R. Weinberg

---

*Bioinformatics* (2021), 00(0), 1–7, <https://doi.org/10.1093/bioinformatics/btab766>

In the originally published version of this manuscript, the equations throughout the paper failed to be rendered correctly. The publisher acknowledges fault for this error. The error has now been corrected throughout the article online.
